# Supplementary material for: Lack of Electron Acceptors Contributes to Redox Stress and Growth Arrest in Asparagine-Starved Sarcoma Cells
Source: MDPI journal article supplement (doi:10.3390/cancers13030412), 2021-01-22
Supplement: s1 [file s1]

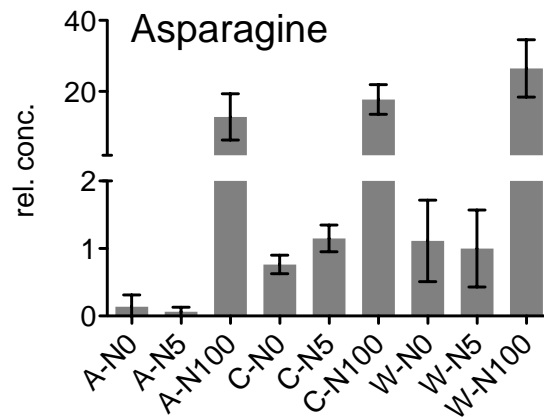

**Figure S1.** Relative asparagine content in shASNS (A), shLuc (C) and wild-type (W) cells grown in medium with 0 mg/L asparagine (N0), 5 mg/L asparagine (N5) and 100 mg/L asparagine (N100). Supplementation with 5ng/mL asparagine did not reverse the effects of the shASNS knockdown. Supplementation with 100ng/ml asparagine raised asparagine content in shASNS, shLuc and wild-type cells to supraphysiological levels.

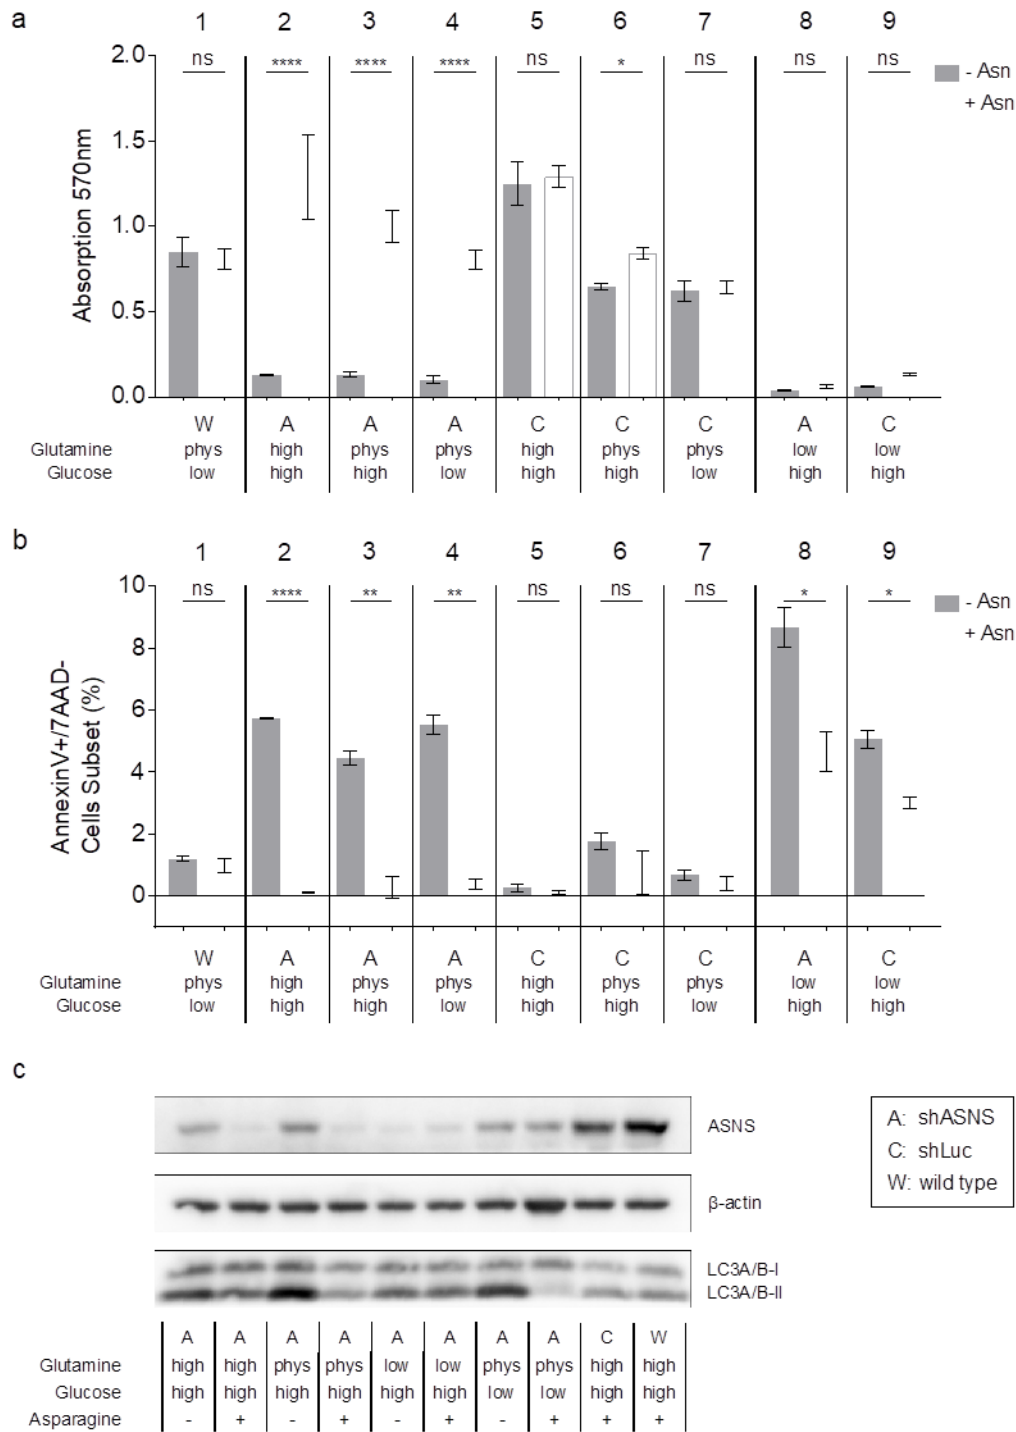

**Figure S2.** Impact of asparagine starvation on proliferation, apoptosis and autophagy of mouse sarcoma cells. The effects of asparagine deprivation were investigated in shASNS mouse sarcoma cells (A), shLuc mouse sarcoma cells (C) and wild-type mouse sarcoma cells (W) in the context of high, physiological and low glutamine (584.6 mg/L, 73.1 mg/L and 7.3 mg/L, respectively) as well as high and low glucose (4.5 g/L and 0.5 g/L, respectively) concentrations. Cellular asparagine deprivation by shASNS knockdown and culture in asparagine-free medium (**a**, 2–4) reduced proliferation and (**b**, 2–4) increased apoptosis in the context of low/high glucose and physiological/high glutamine concentrations. In medium with low glutamine content, both shASNS cells (A) and shLuc control (C) cells exhibited (**a**, 8–9) low proliferative activity and contained (**c**, 8–9) higher proportions of Annexin V<sup>+</sup>/7AAD<sup>+</sup> apoptotic cells. Supplemental asparagine partially rescued the effects of glutamine deprivation on apoptosis, but not on proliferation. (**c**) Asparagine depletion increased LC3I/II processing in low/high glucose and physiological/high glutamine conditions. There was no effect of asparagine deprivation on LC3I/II conversion in low-glutamine conditions. (**a–c**) Exogenous asparagine (5 mg/L) reversed the effects of asparagine depletion on proliferation, apoptosis and autophagy in low/high glucose and physiological/high glutamine conditions. Please see figure S3 for representative FACS plots of Annexin V/7AAD-stained cells. Data were evaluated for statistical significance by unpaired T-tests (ns  $p \geq 0.05$ , \*  $p < 0.05$ , \*\*  $p < 0.01$ , \*\*\*  $p < 0.001$ , \*\*\*\*  $p < 0.0001$ ).

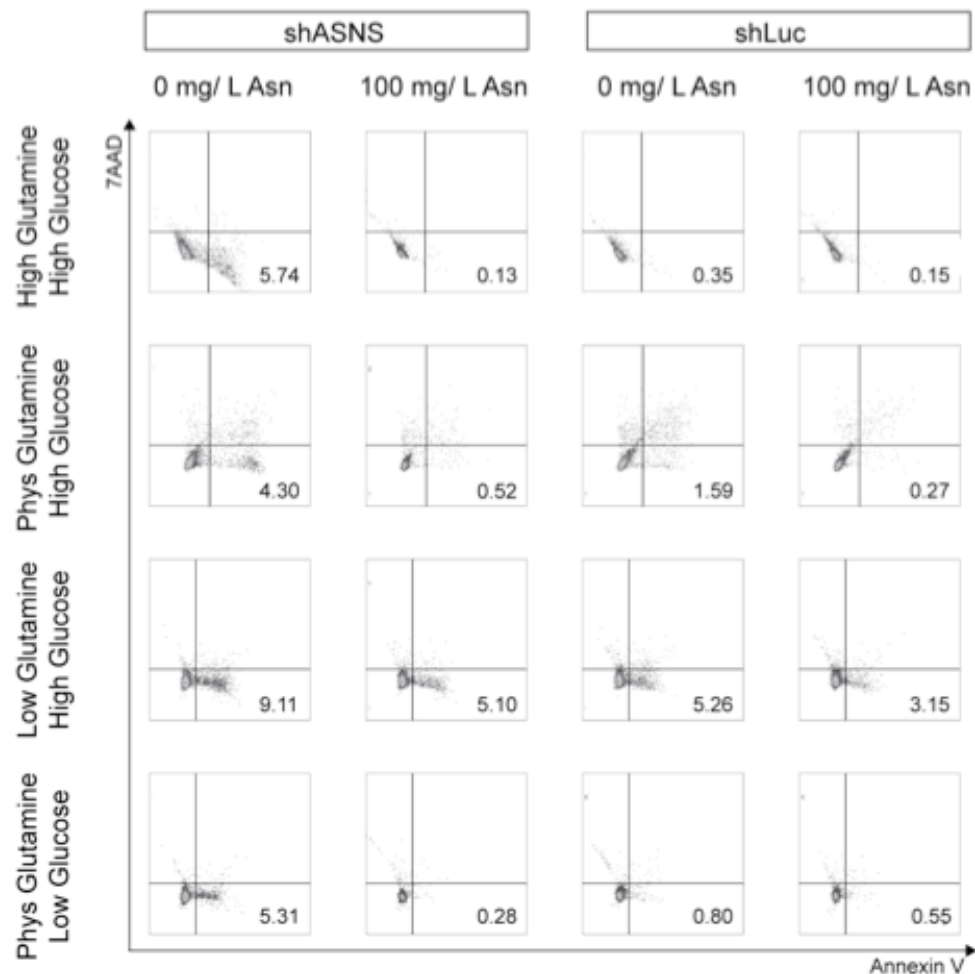

**Figure S3.** Higher percentage of Annexin V positive/ 7AAD negative apoptotic cells among asparagine-starved mouse sarcoma cells. Asparagine depletion was achieved by shASNS knockdown and culture in asparagine-free medium. Pro-apoptotic affects were investigated by Annexin V staining in (top row) high glucose (4.5 g/L)/ high glutamine (584.6 mg/L), (upper middle row) high glucose (4.5 g/L)/ physiological glutamine (73 mg/L), (lower middle row) high glucose (4.5 g/L)/ low glutamine and (bottom row) low glucose (0.5 g/L)/ physiological glutamine (73.1 mg/L) conditions. (top, upper middle and bottom row) Asparagine depletion raised the percentage Annexin V<sup>+</sup>/ 7AAD<sup>-</sup> apoptotic cells in low/ high glucose and physiological/ high glutamine conditions. This was reversed by exogenous addition of asparagine. (lower middle row) In medium with low glutamine content (7.3 mg/L), shASNS sarcoma cells contained many Annexin V<sup>+</sup>/ 7AAD<sup>-</sup> apoptotic cells. Supplemental asparagine partially rescued the effects of glutamine deprivation on apoptosis.

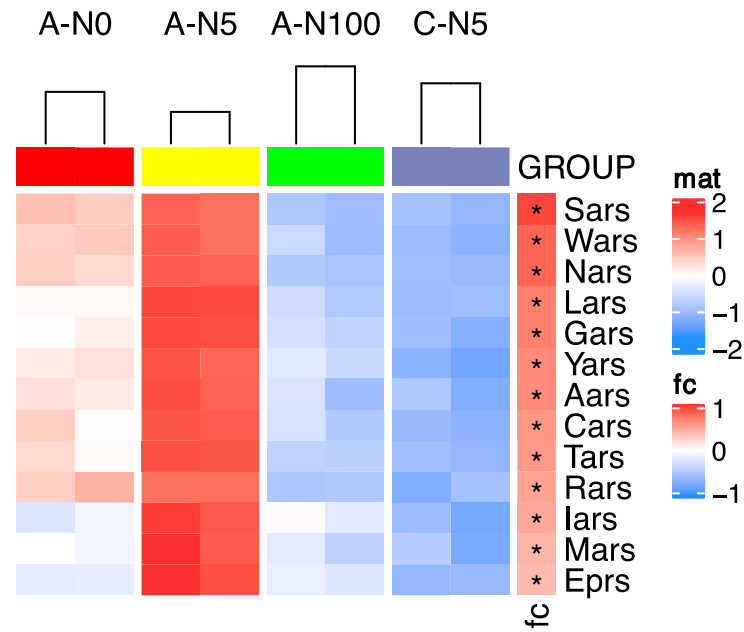

**Figure S4.** Differential expression of transcripts involved in aminoacyl tRNA biosynthesis in shASNS cells grown in medium containing 0 mg/L or 5 mg/L asparagine compared to shASNS cells grown in medium with 100mg/L asparagine and shLuc control cells grown in medium with 5 mg/L asparagine. Aminoacyl tRNA biosynthesis was one of the three top pathways enriched in asparagine-depleted cells as determined by pathway analyses using the KEGG database.

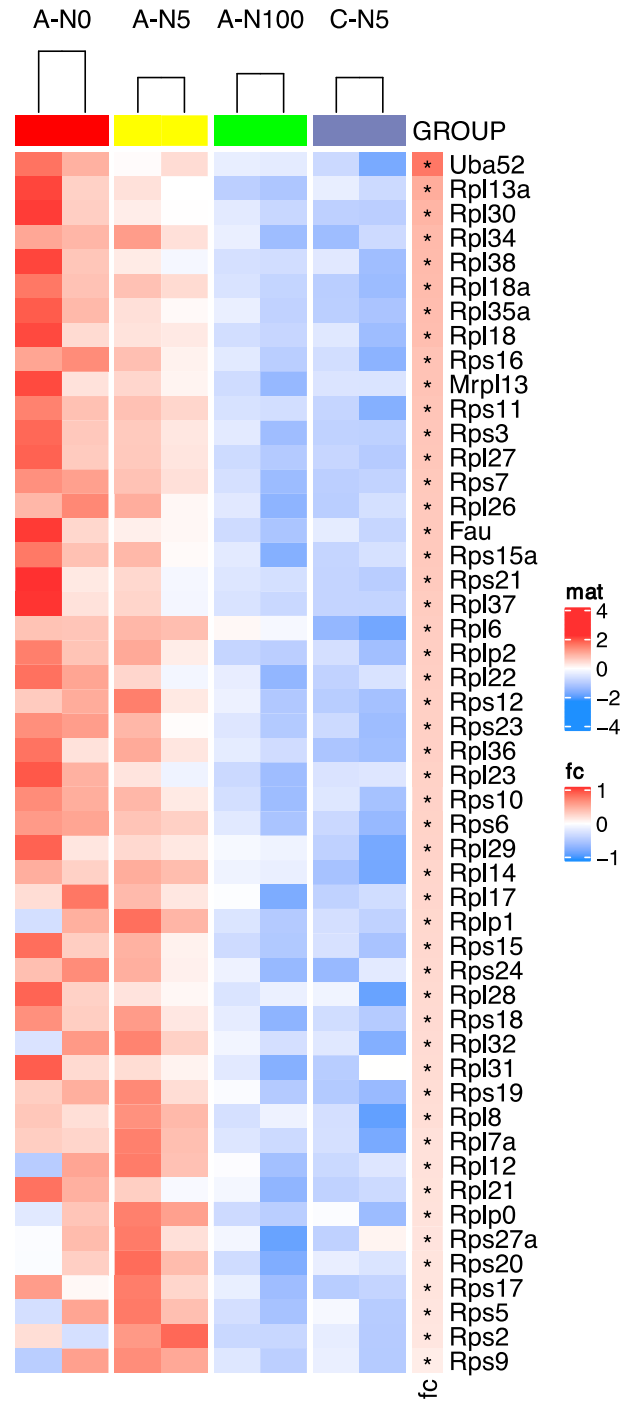

**Figure S5.** Differential expression of transcripts involved in ribosomes in shASNS cells grown in medium containing 0 mg/L or 5 mg/L asparagine compared to shASNS cells grown in medium with 100mg/L asparagine and shLuc control cells grown in medium with 5 mg/L asparagine. Ribosome was one of the three top pathways enriched in asparagine-depleted cells as determined by pathway analyses using the KEGG database.

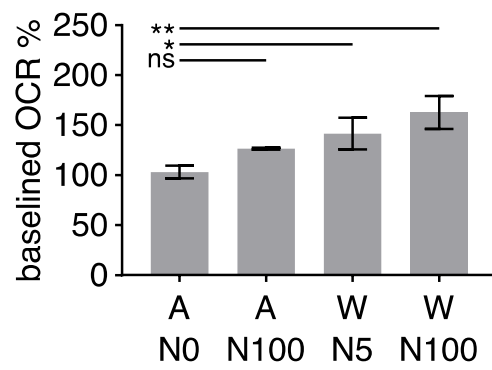

**Figure S6.** Lower oxygen consumption rates in asparagine-depleted cells. Oxygen consumption rates (OCR) were determined by seahorse measurements. OCR was lower in shASNS mouse sarcoma cells grown in asparagine-free medium (A-0) compared to wild-type cells grown in medium with physiological or excess asparagine content (W-N5, W-N100). Data were evaluated for statistical significance by one-way ANOVA with Tukey's post-hoc test.

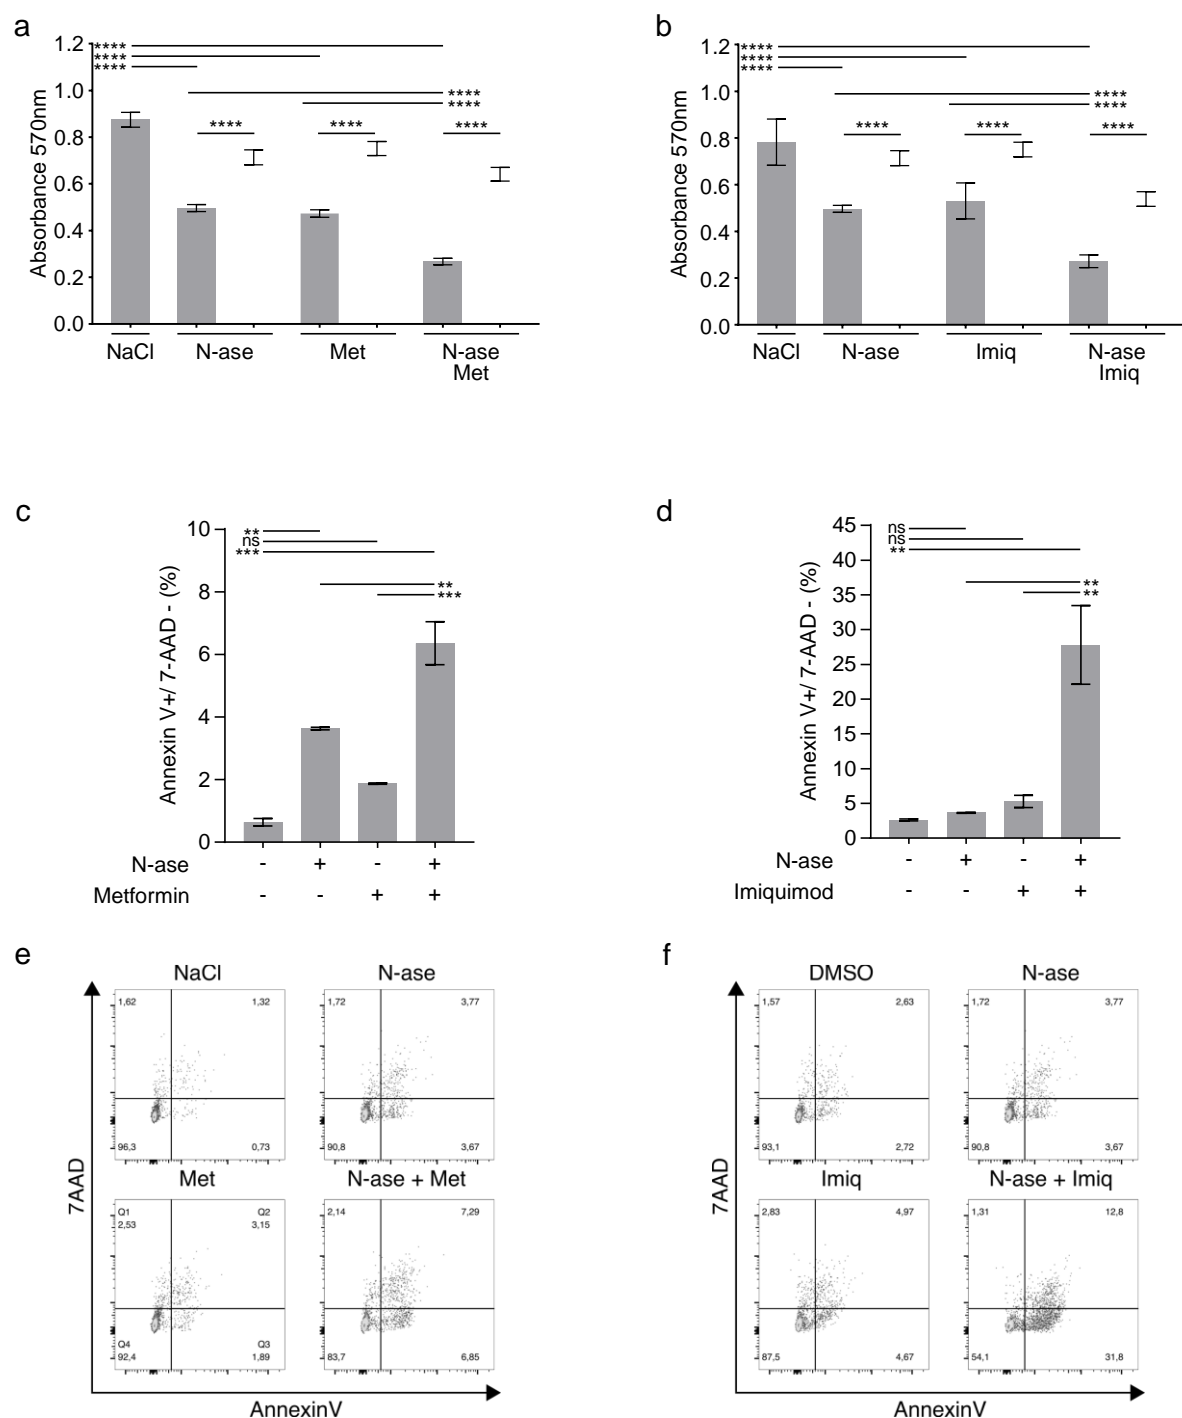

**Figure S7.** Synergistic growth-inhibitory and pro-apoptotic effects of complex 1 inhibitors and asparaginase on human RD rhabdomyosarcoma cells. Complex 1 inhibitors (**a,c,e**) metformin and (**b,d,f**) imiquimod augmented the (**a-b**) growth inhibitory and (**c-f**) pro-apoptotic effects of asparaginase on RD cells. (**a-b**) The anti-proliferative effects of metformin (1 mM), imiquimod (20  $\mu$ M) and asparaginase (0.3 U/ml), alone and in combination, were reversed by addition of pyruvate. Combinatorial treatment with (**c,e**) metformin (2 mM) and (**d,f**) asparaginase (1 U/ml) or imiquimod (50  $\mu$ M) and asparaginase (1 U/ml) deepened the pro-apoptotic effects of each chemical alone. (**e,f**) Data were evaluated for statistical significance by one-way ANOVA with Tukey's post-hoc test (ns  $p \geq 0.05$ , \*  $p < 0.05$ , \*\*  $p < 0.01$ , \*\*\*  $p < 0.001$ , \*\*\*\*  $p < 0.0001$ ).

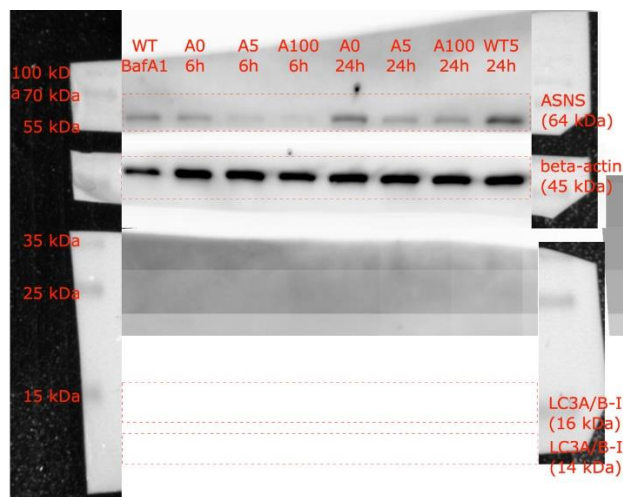

|          | ASNS      | beta-actin |
|----------|-----------|------------|
| A0 6h    | 9085,702  | 26835,907  |
| A5 6h    | 4343,719  | 27695,492  |
| A100 6h  | 2164,991  | 24111,593  |
| A0 24h   | 17678,312 | 27829,543  |
| A5 24h   | 9946,087  | 28393,099  |
| A100 24h | 9883,602  | 26292,886  |
| WT5 24h  | 23091,132 | 28363,078  |

**Figure S8.** Raw data of Figure 2d.

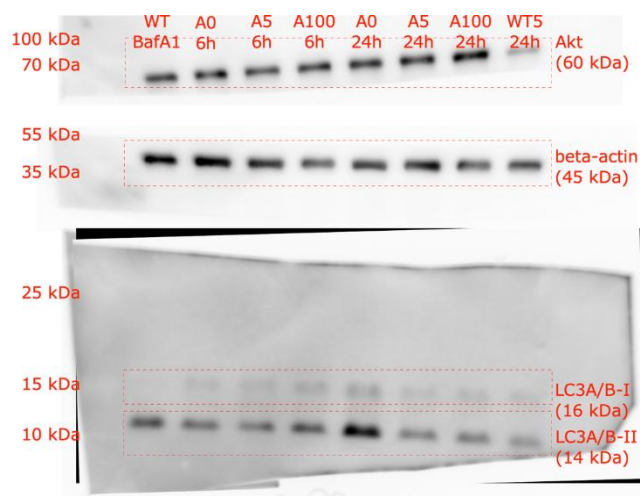

|          | beta-actin | LC3A/B II |
|----------|------------|-----------|
| A0 6h    | 22790,936  | 8351,258  |
| A5 6h    | 17546,744  | 6770,409  |
| A100 6h  | 11648,773  | 10358,38  |
| A0 24h   | 14086,016  | 22191,421 |
| A5 24h   | 17643,794  | 7530,238  |
| A100 24h | 12266,187  | 7158,652  |
| WT5 24h  | 12603,066  | 3189,175  |

**Figure S9.** Raw data of Figure 2e.



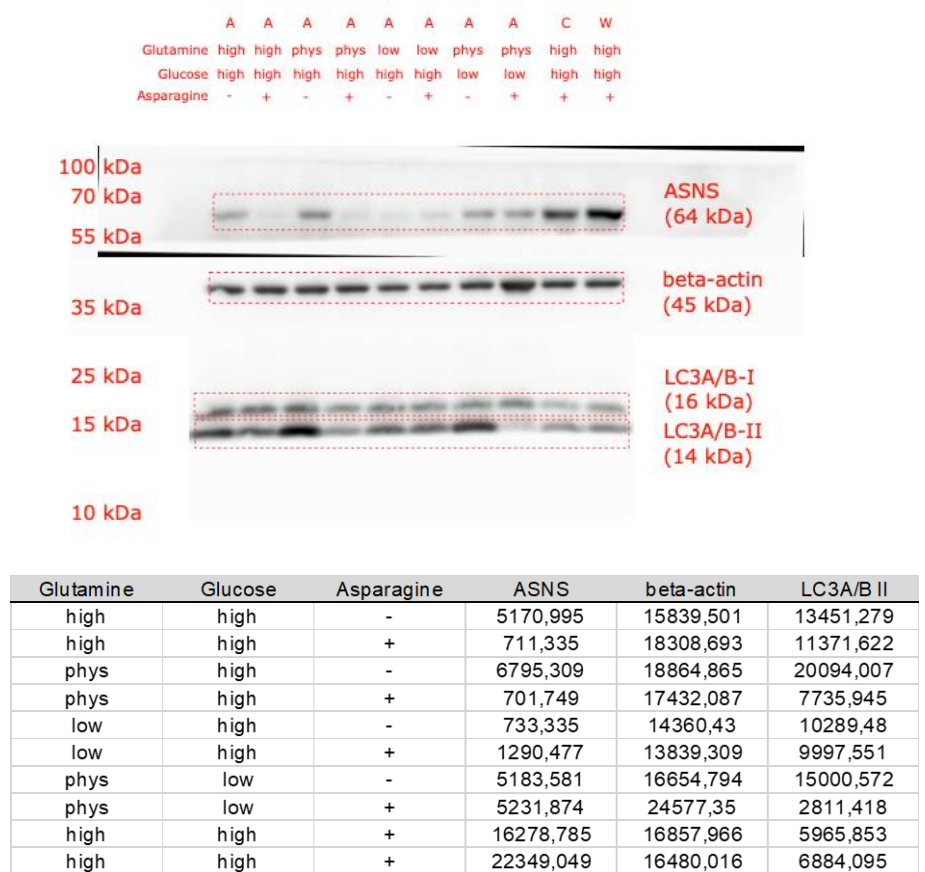

**Figure S10.** Raw data of Figure S2.
